# Supplementary material for: CT perfusion-based delta-radiomics models to identify collateral vessel formation after revascularization in patients with moyamoya disease
Source: Front Neurosci. 2022 Aug 11;16:974096. doi: 10.3389/fnins.2022.974096 (PMC9403315; doi:10.3389/fnins.2022.974096)
Supplement: Supplementary file 2 [file Table_1.XLSX]

## Sheet: Sheet1
	1	2	3	4	5	6	7	8	9	10	11	12	13	14	15	16	17	18	19	20	21	22	23	24	25	26	27	28	29	30	31	32	33	34	35	36	37	38	39	40	41	42	43	44	45	46	47	48	49
Features	original_firstorder_InterquartileRange	original_firstorder_Skewness	original_firstorder_Uniformity	original_firstorder_Median	original_firstorder_Energy	original_firstorder_RobustMeanAbsoluteDeviation	original_firstorder_MeanAbsoluteDeviation	original_firstorder_TotalEnergy	original_firstorder_Maximum	original_firstorder_RootMeanSquared	original_firstorder_90Percentile	original_firstorder_Minimum	original_firstorder_Entropy	original_firstorder_Range	original_firstorder_Variance	original_firstorder_10Percentile	original_firstorder_Kurtosis	original_firstorder_Mean	original_glcm_JointAverage	original_glcm_SumAverage	original_glcm_JointEntropy	original_glcm_ClusterShade	original_glcm_MaximumProbability	original_glcm_Idmn	original_glcm_JointEnergy	original_glcm_Contrast	original_glcm_DifferenceEntropy	original_glcm_InverseVariance	original_glcm_DifferenceVariance	original_glcm_Idn	original_glcm_Idm	original_glcm_Correlation	original_glcm_Autocorrelation	original_glcm_SumEntropy	original_glcm_MCC	original_glcm_SumSquares	original_glcm_ClusterProminence	original_glcm_Imc2	original_glcm_Imc1	original_glcm_DifferenceAverage	original_glcm_Id	original_glcm_ClusterTendency	original_gldm_GrayLevelVariance	original_gldm_HighGrayLevelEmphasis	original_gldm_DependenceEntropy	original_gldm_DependenceNonUniformity	original_gldm_GrayLevelNonUniformity	original_gldm_SmallDependenceEmphasis	original_gldm_SmallDependenceHighGrayLevelEmphasis
Post-operation	0.0666904	-1.76875	0.752256	1.94602	3155.28	0.343187	0.6486	9465.85	2.44721	1.77542	1.98421	-1.05766	0.596814	3.50488	0.746133	-0.250444	4.39776	1.55113	1.85501	3.71003	1.06221	-0.434636	0.791725	0.974684	0.642007	0.126579	0.544816	0.126579	0.110068	0.957807	0.936711	0.489991	3.50175	0.935636	0.489991	0.123962	0.736705	0.473995	-0.221467	0.126579	0.936711	0.36927	0.123872	3.56543	2.5733	316.381	753.008	0.024535	0.0711044
Pre-operation	0.0403891	-3.80926	0.910123	1.8826	4580.2	0.0174274	0.257771	13740.6	2.3793	1.83718	1.94127	-1.06732	0.27422	3.44662	0.290698	1.84679	16.2103	1.75629	1.95374	3.90747	0.475696	-0.191908	0.930152	0.990566	0.866825	0.0471686	0.274014	0.0471686	0.0449293	0.984277	0.976416	0.46543	3.83763	0.428527	0.46543	0.044123	0.33228	0.347716	-0.240119	0.0471686	0.976416	0.129323	0.0449385	3.85851	1.60172	760.094	1235.04	0.0211606	0.0648111
Delta-features	0.0263013	2.04051	-0.157867	0.0634203	-1424.92	0.32576	0.39083	-4274.76	0.0679121	-0.0617588	0.0429422	0.00965225	0.322594	0.0582598	0.455436	-2.09723	-11.8126	-0.205159	-0.0987221	-0.197444	0.586519	-0.242728	-0.138427	-0.015882	-0.224817	0.0794102	0.270802	0.0794102	0.0651388	-0.0264701	-0.0397051	0.0245607	-0.335871	0.507109	0.0245607	0.0798393	0.404425	0.126279	0.0186524	0.0794102	-0.0397051	0.239947	0.0789336	-0.293077	0.971582	-443.713	-482.029	0.00337447	0.00629326
[truncated: 1,346 more columns]
